# Supplementary material for: Chloroform conversion into ethane and propane by catalytic hydrodechlorination with Pd supported on activated carbons from lignin
Source: Royal Society of Chemistry journal article supplement (doi:10.1039/c8cy00461g), 2018-01-01
Supplement: c8cy00461g1.pdf [file c8cy00461g1.pdf]

# Chloroform conversion into ethane and propane by catalytic hydrodechlorination with Pd supported on activated carbons from lignin

*C. Fernandez-Ruiz, J. Bedia\*, P. Bonal, J.J. Rodriguez, L.M. Gómez-Sainero*

*Sección de Ingeniería Química, Facultad de Ciencias, Universidad Autónoma de Madrid, Cantoblanco,  
28049 Madrid, Spain*

## ELECTRONIC SUPPLEMENTARY INFORMATION

---

Table ES1. Characterization of the porous texture of the activated carbons.

| Catalyst | $A_{\text{BET}}$<br>( $\text{m}^2/\text{g}$ ) | $V_{\text{micro}}$<br>( $\text{cm}^3/\text{g}$ ) | $A_{\text{ext}}$<br>( $\text{m}^2/\text{g}$ ) | $V_{\text{poro}}$<br>( $\text{cm}^3/\text{g}$ ) |
|----------|-----------------------------------------------|--------------------------------------------------|-----------------------------------------------|-------------------------------------------------|
| Fe3-800  | 951                                           | 0.44                                             | 34                                            | 0.53                                            |
| Zn3-500  | 1142                                          | 0.26                                             | 569                                           | 0.99                                            |
| P3-500   | 559                                           | 0.10                                             | 348                                           | 0.45                                            |
| Na4-800  | 2350                                          | 1.05                                             | 186                                           | 1.26                                            |
| K4-800   | 3191                                          | 1.40                                             | 242                                           | 1.63                                            |

Table ES2. Bulk palladium content of the catalysts as determined by ICP.

| Catalyst   | Pd (wt.%) |
|------------|-----------|
| Fe3-800-Pd | 0.93      |
| Zn3-500-Pd | 1.07      |
| P3-500-Pd  | 1.02      |
| Na4-800-Pd | 0.99      |
| K4-800-Pd  | 0.96      |

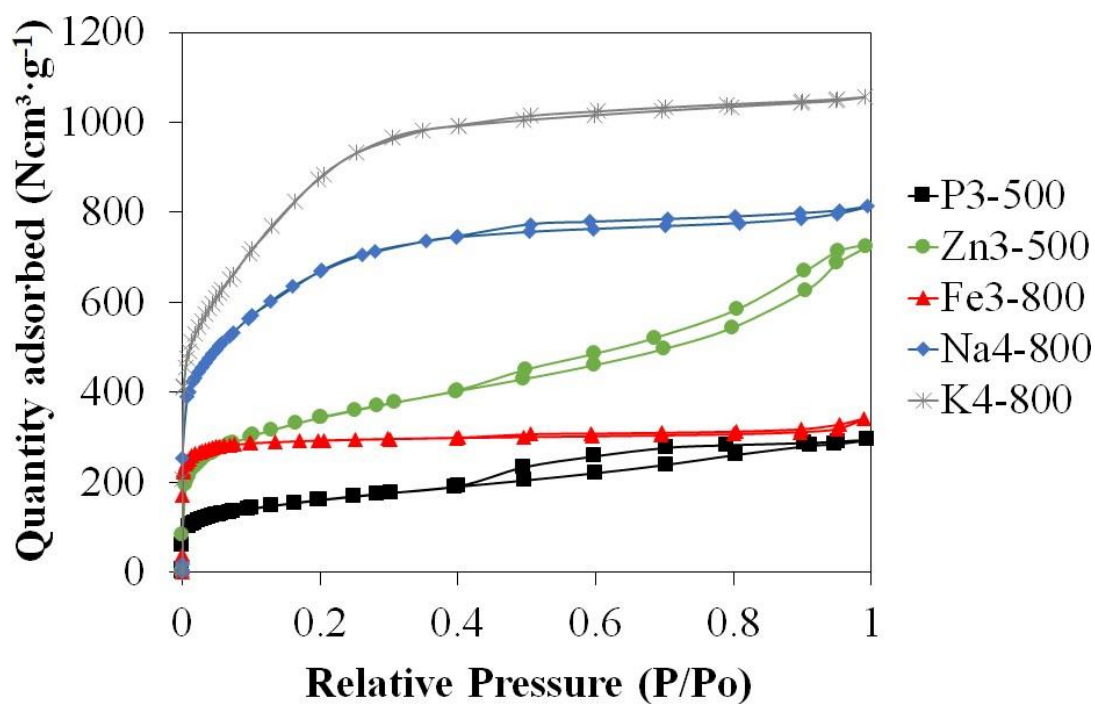

Figure ES1. N<sub>2</sub> adsorption-desorption isotherms at -196 °C of the activated carbons used as supports.

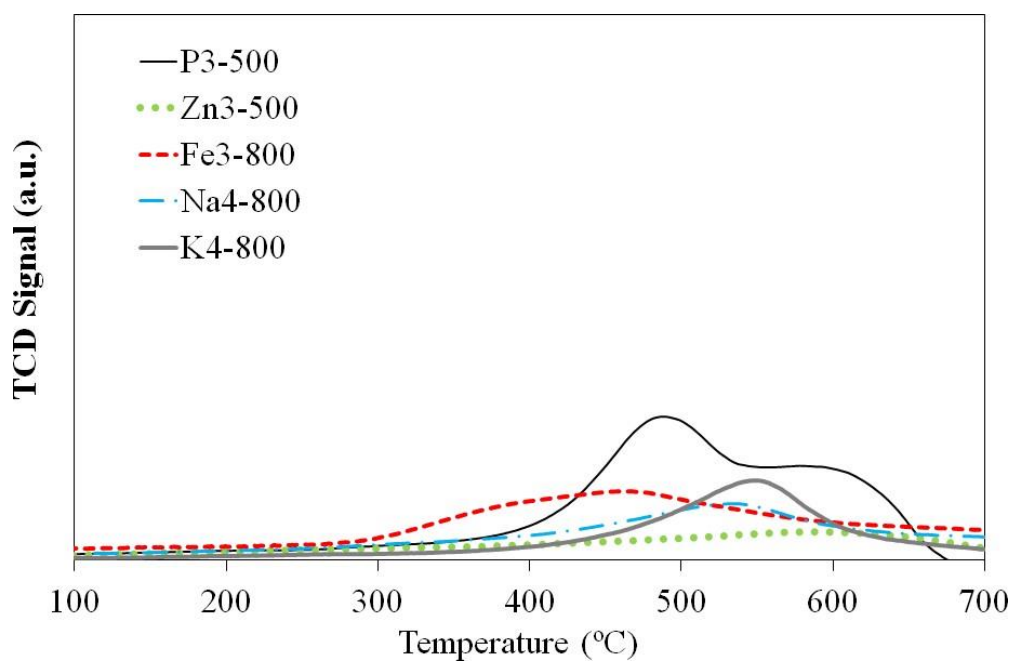

Figure ES2. TPR profiles of the activated carbons in 10% H<sub>2</sub>/Ar (50 cm<sup>3</sup>·min<sup>-1</sup>).

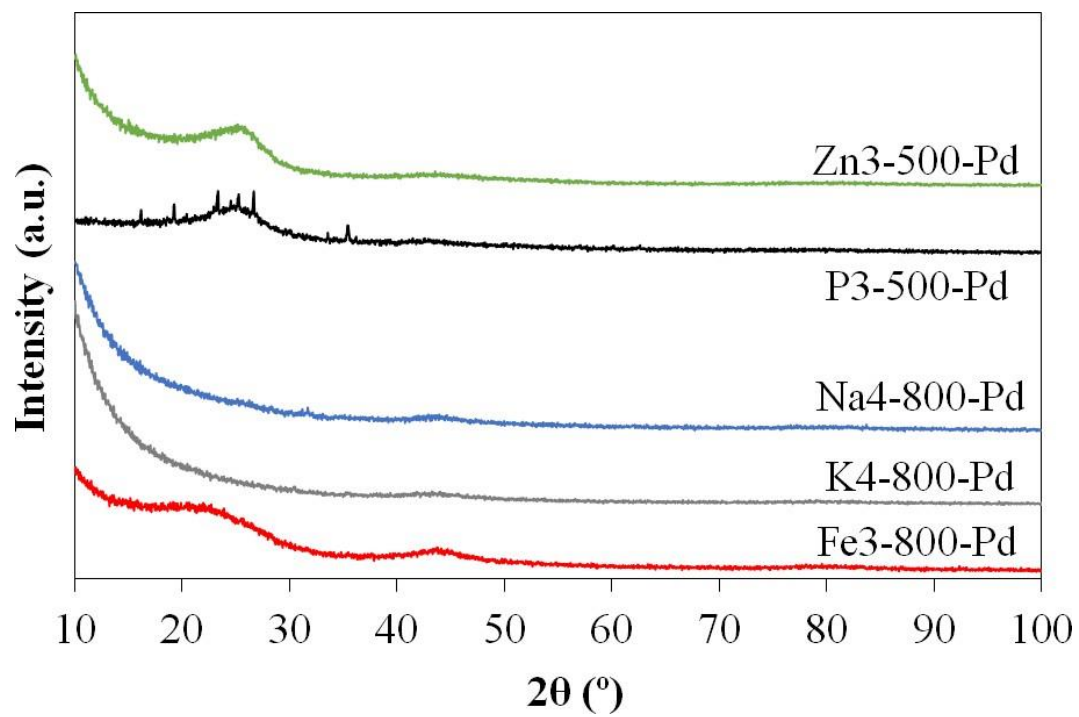

Figure ES3. XRD patterns of the catalysts.

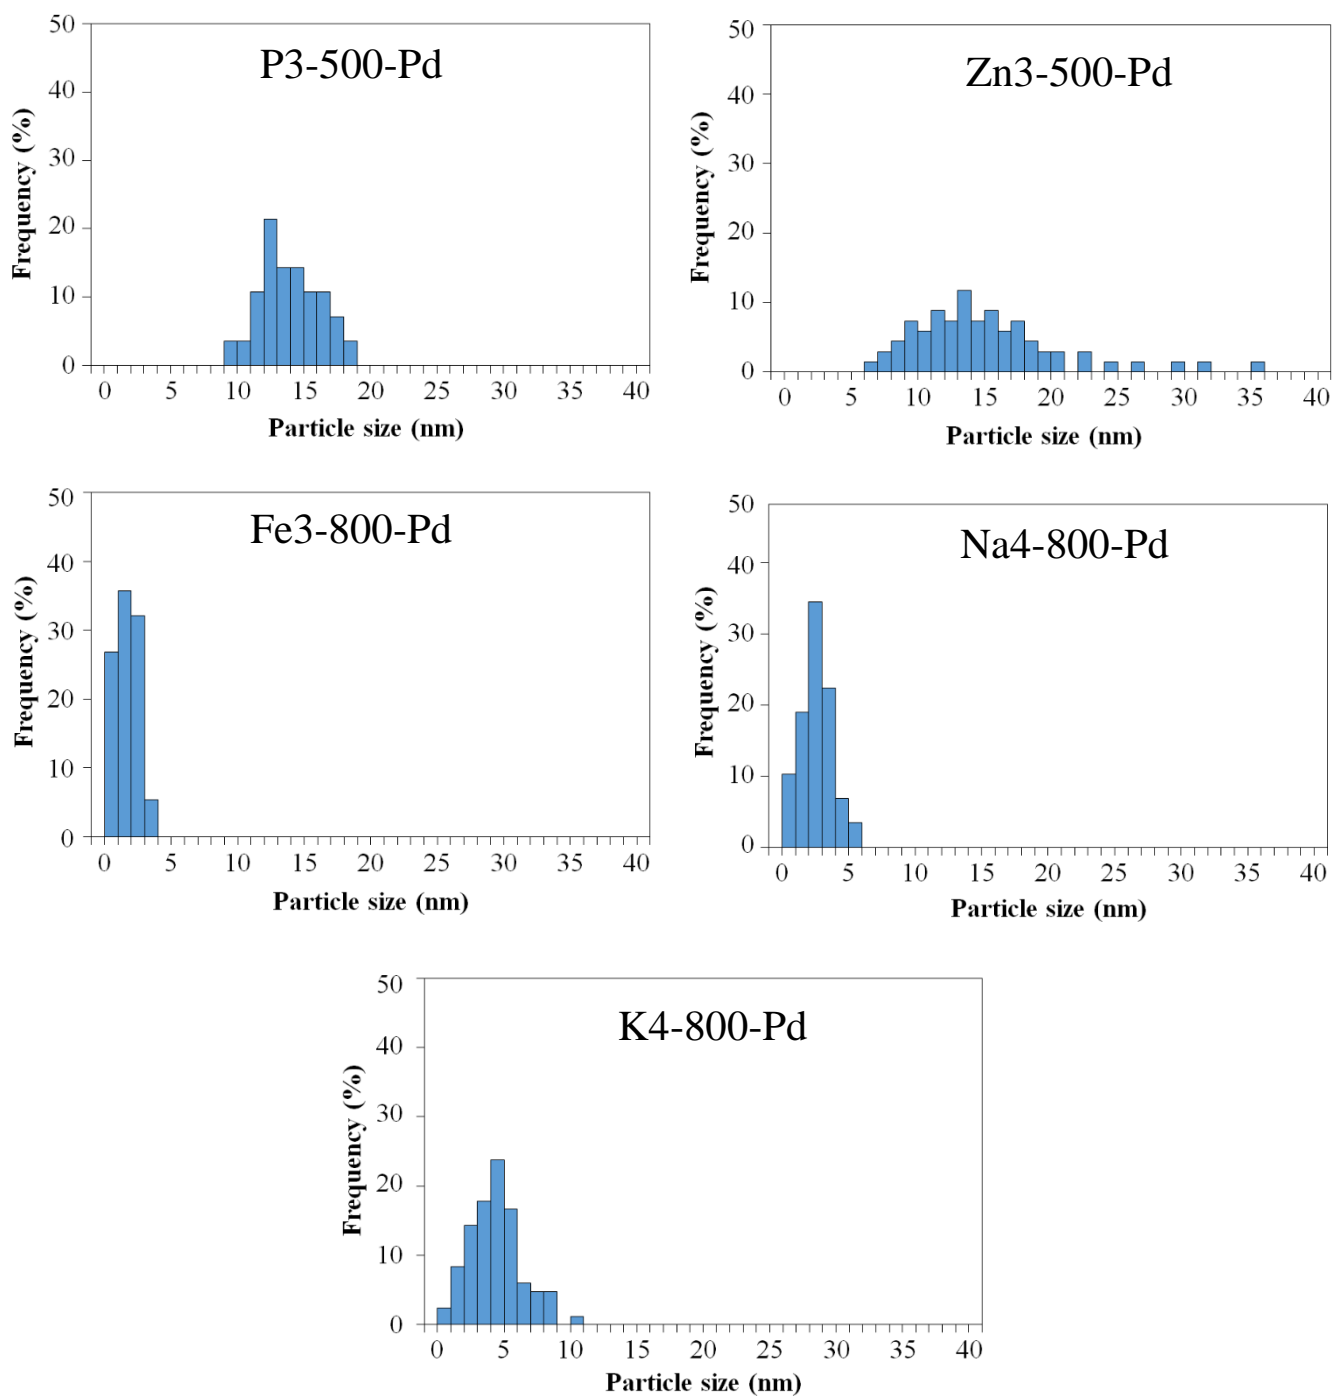

Figure ES4. Pd-particle size distributions of the catalysts.

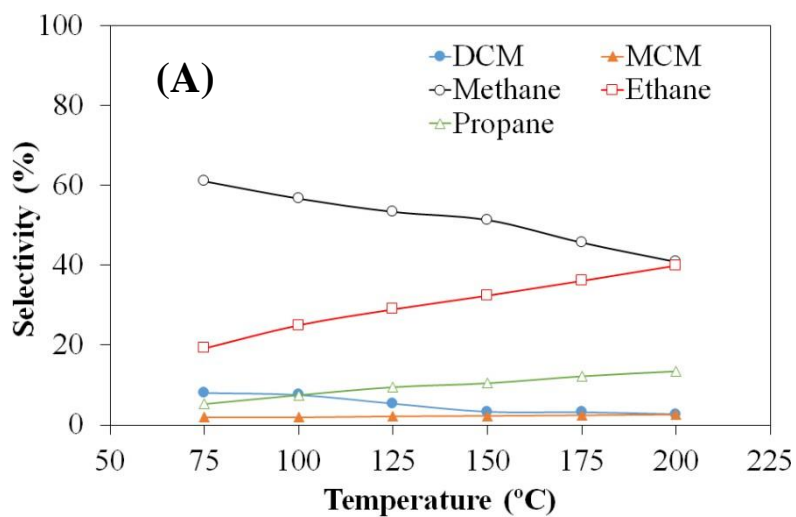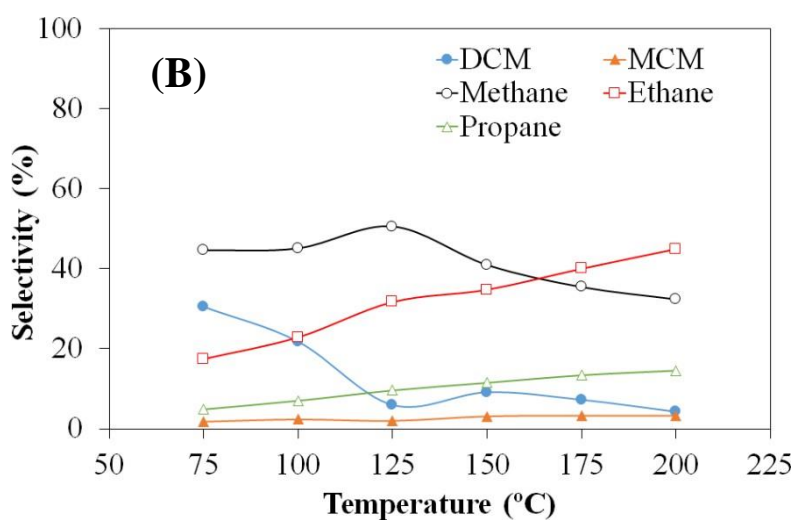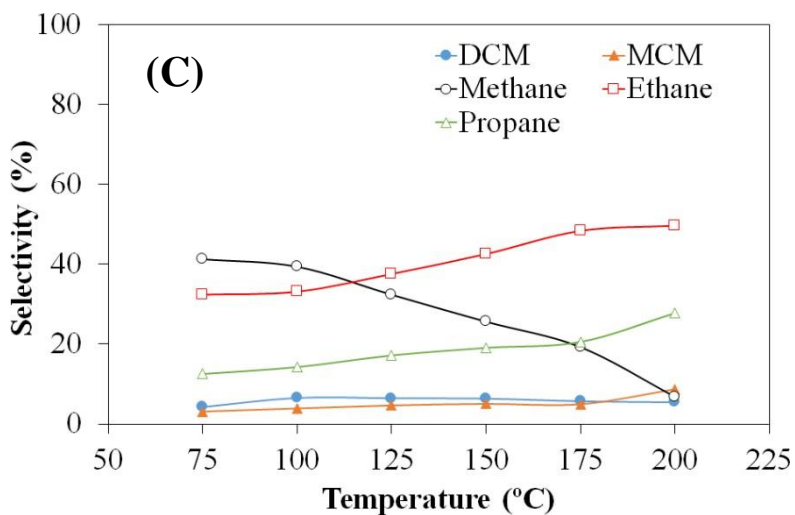

Figure ES5. Selectivity versus reaction temperature with (A) Zn3-500-Pd. (B) Fe3-800-Pd and (C) Na4-800-Pd ( $\tau = 0.8 \text{ kg}_{\text{cat}} \cdot \text{h} \cdot \text{mol}^{-1}$ ; see conversion vs temperature in Figure 6).
